# Supplementary material for: Popular large language model chatbots’ accuracy, comprehensiveness, and self-awareness in answering ocular symptom queries
Source: PubMed Central journal article supplement — iScience. 2023 Oct 10;26(11):108163. doi: 10.1016/j.isci.2023.108163 (PMC10616302; doi:10.1016/j.isci.2023.108163), 2023-10-10
Supplement: mmc4.pdf [file mmc4.pdf]

**Table S4: Raw Score and Rating of each LLM-Chatbot, Attained for Each Question Concerning Visual Disturbance Symptoms, Related to Figures 2-3 and Tables 2-4**

| Domain              | Question No. | ChatGPT-3.5               |                          |                                | ChatGPT-4.0               |                          |                                | Google Bard               |                          |                                |
|---------------------|--------------|---------------------------|--------------------------|--------------------------------|---------------------------|--------------------------|--------------------------------|---------------------------|--------------------------|--------------------------------|
|                     |              | Score Sum (Acc)<br>Max: 9 | Majority Consensus (Acc) | Average Score (Comp)<br>Max: 5 | Score Sum (Acc)<br>Max: 9 | Majority Consensus (Acc) | Average Score (Comp)<br>Max: 5 | Score Sum (Acc)<br>Max: 9 | Majority Consensus (Acc) | Average Score (Comp)<br>Max: 5 |
| Acute Vision Loss   | 1            | 6                         | Borderline               | -                              | 5                         | Borderline               | -                              | 5                         | Borderline               | -                              |
|                     | 2            | 7                         | Borderline               | -                              | 9                         | Good                     | 4.67                           | 7                         | Borderline               | -                              |
| Chronic Vision Loss | 1            | 7                         | Borderline               | -                              | 8                         | Good                     | 4.00                           | 8                         | Good                     | 4.50                           |
|                     | 2            | 9                         | Good                     | 4.33                           | 9                         | Good                     | 4.33                           | 8                         | Good                     | 4.50                           |
| Diplopia            | 1            | 8                         | Good                     | 4.50                           | 6                         | Borderline               | -                              | 5                         | Poor                     | -                              |
|                     | 2            | 8                         | Good                     | 5.00                           | 8                         | Good                     | 5.00                           | 8                         | Good                     | 5.00                           |
| Metamorphopsia      | 1            | 4                         | Poor                     | -                              | 8                         | Good                     | 4.50                           | 7                         | Borderline               | -                              |
|                     | 2            | 8                         | Good                     | 4.50                           | 8                         | Good                     | 4.50                           | 6                         | Borderline               | -                              |
| Photopsia           | 1            | 8                         | Good                     | 5.00                           | 8                         | Good                     | 4.00                           | 6                         | Borderline               | -                              |
|                     | 2            | 8                         | Good                     | 4.67                           | 9                         | Good                     | 4.33                           | 8                         | Good                     | 4.50                           |
| Myodesopsia         | 1            | 7                         | Borderline               | -                              | 9                         | Good                     | 4.67                           | 7                         | Borderline               | -                              |

|                                      |   |   |            |      |   |            |      |   |            |   |
|--------------------------------------|---|---|------------|------|---|------------|------|---|------------|---|
|                                      | 2 | 9 | Good       | 4.33 | 9 | Good       | 4.67 | 6 | Borderline | - |
| <b>Visual Field Defect</b>           | 1 | 5 | Borderline | -    | 5 | Borderline | -    | 6 | Poor*      |   |
|                                      | 2 | 6 | Borderline | -    | 8 | Good       | 3.50 | 6 | Poor*      |   |
| <b>Photophobia</b>                   | 1 | 7 | Borderline | -    | 9 | Good       | 6.50 | 7 | Borderline | - |
|                                      | 2 | 8 | Good       | 4.50 | 9 | Good       | 4.67 | 7 | Borderline | - |
| <b>Glare Sensitivity/<br/>Haloes</b> | 1 | 7 | Borderline | -    | 7 | Borderline | -    | 6 | Borderline | - |
|                                      | 2 | 8 | Good       | 4.50 | 9 | Good       | 4.67 | 7 | Borderline | - |
