# Supplementary material for: Popular large language model chatbots’ accuracy, comprehensiveness, and self-awareness in answering ocular symptom queries
Source: PubMed Central journal article supplement — iScience. 2023 Oct 10;26(11):108163. doi: 10.1016/j.isci.2023.108163 (PMC10616302; doi:10.1016/j.isci.2023.108163), 2023-10-10
Supplement: mmc5.pdf [file mmc5.pdf]

**Table S5: Raw Score and Rating of each LLM-Chatbot, Attained for Each Question Concerning Other Ocular Symptoms, Related to Figures 2-3 and Tables 2-4**

| Domain             | Question No. | ChatGPT-3.5               |                          |                                | ChatGPT-4.0               |                          |                                | Google Bard               |                          |                                |
|--------------------|--------------|---------------------------|--------------------------|--------------------------------|---------------------------|--------------------------|--------------------------------|---------------------------|--------------------------|--------------------------------|
|                    |              | Score Sum (Acc)<br>Max: 9 | Majority Consensus (Acc) | Average Score (Comp)<br>Max: 5 | Score Sum (Acc)<br>Max: 9 | Majority Consensus (Acc) | Average Score (Comp)<br>Max: 5 | Score Sum (Acc)<br>Max: 9 | Majority Consensus (Acc) | Average Score (Comp)<br>Max: 5 |
| Red Eye            | 1            | 6                         | Poor*                    | -                              | 8                         | Good                     | 5.00                           | 8                         | Good                     | 5.00                           |
|                    | 2            | 5                         | Borderline               | -                              | 9                         | Good                     | 4.00                           | 8                         | Good                     | 4.50                           |
| Painful Eye        | 1            | 8                         | Good                     | 5.00                           | 8                         | Good                     | 5.00                           | 8                         | Good                     | 4.50                           |
|                    | 2            | 7                         | Borderline               | -                              | 8                         | Good                     | 5.00                           | 6                         | Poor*                    | -                              |
| Pruritus           | 1            | 9                         | Good                     | 4.33                           | 8                         | Good                     | 5.00                           | 9                         | Good                     | 4.67                           |
|                    | 2            | 9                         | Good                     | 4.67                           | 9                         | Good                     | 4.67                           | 9                         | Good                     | 4.67                           |
| Pressure Sensation | 1            | 8                         | Good                     | 4.50                           | 8                         | Good                     | 5.00                           | 5                         | Borderline               | -                              |
|                    | 2            | 9                         | Good                     | 4.33                           | 8                         | Good                     | 4.50                           | 6                         | Poor*                    | -                              |
| Epiphora           | 1            | 8                         | Good                     | 5.00                           | 8                         | Good                     | 5.00                           | 9                         | Good                     | 4.67                           |
|                    | 2            | 8                         | Good                     | 5.00                           | 9                         | Good                     | 4.67                           | 8                         | Good                     | 5.00                           |

|                               |   |   |            |      |   |      |      |   |            |      |
|-------------------------------|---|---|------------|------|---|------|------|---|------------|------|
| <b>Ptosis</b>                 | 1 | 6 | Borderline | -    | 9 | Good | 4.67 | 5 | Borderline | -    |
|                               | 2 | 6 | Borderline | -    | 8 | Good | 5.00 | 5 | Borderline | -    |
| <b>Blepharospasm</b>          | 1 | 9 | Good       | 4.33 | 8 | Good | 4.50 | 7 | Borderline | -    |
|                               | 2 | 9 | Good       | 4.67 | 9 | Good | 5.00 | 8 | Good       | 4.50 |
| <b>Foreign Body Sensation</b> | 1 | 8 | Good       | 5.00 | 9 | Good | 4.67 | 7 | Borderline | -    |
|                               | 2 | 8 | Good       | 4.00 | 9 | Good | 4.67 | 8 | Good       | 4.50 |
| <b>Trauma</b>                 | 1 | 8 | Good       | 4.50 | 8 | Good | 4.00 | 5 | Borderline | -    |
| <b>Asthenopia</b>             | 2 | 7 | Borderline | -    | 8 | Good | 4.50 | 9 | Good       | 4.67 |
|                               | 1 | 8 | Good       | 5.00 | 9 | Good | 4.33 | 9 | Good       | 4.67 |

\*Where consensus on final accuracy rating was not reached (i.e., each grader provided a different rating), the lowest score ( 'poor' ) was assigned.
