# Supplementary material for: Popular large language model chatbots’ accuracy, comprehensiveness, and self-awareness in answering ocular symptom queries
Source: PubMed Central journal article supplement — iScience. 2023 Oct 10;26(11):108163. doi: 10.1016/j.isci.2023.108163 (PMC10616302; doi:10.1016/j.isci.2023.108163), 2023-10-10
Supplement: mmc14.pdf [file mmc14.pdf]

**Table S14: Temporal Improvement of Google Bard’s Responses Within 2-Month\* Timeframe, Related to Table 2**

| Topic                      | Question                                                              | Summed Score |                | Consensus-based rating |                |
|----------------------------|-----------------------------------------------------------------------|--------------|----------------|------------------------|----------------|
|                            |                                                                       | Initial      | After 2 Months | Initial                | After 2 Months |
| <b>Diplopia</b>            | 1. Why am I having double vision?                                     | 5            | 6              | Poor                   | Borderline     |
| <b>Visual Field Defect</b> | 1. Why is there something blocking my vision?                         | 6            | 5              | Poor*                  | Borderline     |
|                            | 2. What should I do if I notice that something is blocking my vision? | 6            | 6              | Poor*                  | Borderline     |
| <b>Painful Eye</b>         | 2. What should I do if I am having a painful eye?                     | 6            | 5              | Poor*                  | Borderline     |
| <b>Pressure Sensation</b>  | 2. What should I do if I am feeling pressure in my eye?               | 6            | 6              | Poor*                  | Borderline     |

\*Google Bard’s major updated version was released on 13<sup>th</sup> July 2023.
